# Supplementary material
Source: MDPI journal article supplement (https://www.mdpi.com/2076-3417/13/10/5927)
Supplement: s1 [file s1]

**Table S1.** Mean composition of triglycerides (TG) (g TG/ 100 g of fat) in control (ChC) and HPP treated (600 MPa/6 min - P1, 450 MPa/6 min – P2 and 450 MPa/9 min) *Serra da Estrela* cheeses.

| Storage time (Months) | Chc               |             |             | P1 - 600 MPa/6 min |                   |             | P2 - 450 MPa/6 min |                   |                   | P3 - 450 MPa/9 min |                   |                   |
|-----------------------|-------------------|-------------|-------------|--------------------|-------------------|-------------|--------------------|-------------------|-------------------|--------------------|-------------------|-------------------|
|                       | 0                 | 6           | 15          | 0                  | 6                 | 15          | 0                  | 6                 | 15                | 0                  | 6                 | 15                |
| C24                   | 0.367±0.054       | 0.217±0.038 | 0.354±0.167 | 0.308±0.147        | 0.293±0.131       | 0.680±0.01  | 0.454±0.056        | 0.438±0.246       | 0.543±0.008       | 0.299±0.084        | 0.434±0.017       | 0.58±0.013        |
| Ch                    | 0.285±0.097       | 0.210±0.134 | 0.269±0.119 | 0.314±0.014        | 0.345±0.008       | 0.379±0.049 | 0.338±0.003        | 0.367±0.022       | 0.279±0.021       | 0.232±0.077        | 0.246±0.193       | 0.293±0.032       |
| C26                   | 0.500±0.301       | 0.287±0.02  | 0.700±0.154 | 0.188±0.104        | 0.672±0.074       | 0.831±0.045 | 0.691±0.155        | 0.658±0.033       | 0.510±0.016       | 0.537±0.035        | 0.580±0.346       | 0.577±0.003       |
| IS                    | 0.894±0.205       | 1.13±0.141  | 1.03±0.122  | 1.12±0.18          | 0.893±0.042       | 1.04±0.011  | 0.891±0.023        | 1.08±0.391        | 0.856±0.159       | 0.874±0.063        | 0.982±0.101       | 0.839±0.025       |
| C28                   | 1.70±0.25         | 1.50±0.11   | 1.43±0.24   | 1.54±0.19          | 1.45±0.30         | 1.64±0.81   | 1.15±0.11          | 1.90±0.03         | 1.38±0.14         | 1.29±0.07          | 1.77±0.01         | 1.52±0.02         |
| C30                   | 2.68±0.42         | 2.35±0.11   | 2.63±0.06   | 2.49±0.28          | 2.95±0.32         | 2.59±1.06   | 2.56±0.08          | 2.90±0.03         | 2.21±0.02         | 2.39±0.23          | 2.78±0.01         | 2.26±0.19         |
| C32                   | 4.10±0.57         | 3.60±0.09   | 4.17±0.21   | 3.75±0.35          | 4.51±0.41         | 4.59±1.10   | 4.06±0.16          | 4.47±0.08         | 3.3±0.11          | 3.78±0.22          | 4.23±0.13         | 3.49±0.24         |
| C34                   | <b>5.98</b> ±0.77 | 5.25±0.11   | 6.10±0.24   | <b>5.40</b> ±0.54  | <b>6.33</b> ±0.42 | 6.56±1.42   | <b>5.81</b> ±0.21  | <b>6.53</b> ±0.13 | <b>4.93</b> ±0.01 | <b>5.30</b> ±0.24  | <b>6.15</b> ±0.36 | <b>5.11</b> ±0.47 |
| C36                   | <b>7.14</b> ±1.47 | 6.59±0.06   | 7.83±0.37   | <b>6.86</b> ±0.58  | <b>7.84</b> ±0.32 | 8.16±1.46   | <b>8.33</b> ±1.56  | <b>8.28</b> ±0.35 | <b>6.19</b> ±0.14 | <b>6.55</b> ±0.15  | <b>7.92</b> ±0.43 | <b>6.54</b> ±0.71 |
| C38                   | 3.73±2.23         | 1.72±0.05   | 2.03±0.14   | 1.77±0.20          | 2.01±0.09         | 2.15±0.47   | 1.89±0.08          | 2.13±0.03         | 1.61±0.02         | 1.62±0.09          | 2.02±0.06         | 1.69±0.13         |
| C40                   | <b>7.91</b> ±0.67 | 6.21±0.14   | 7.18±0.03   | <b>6.40</b> ±0.39  | <b>8.09</b> ±1.35 | 7.61±1.24   | <b>6.83</b> ±0.10  | <b>7.68</b> ±0.59 | <b>5.74</b> ±0.34 | <b>7.64</b> ±0.09  | <b>8.32</b> ±0.76 | <b>6.07</b> ±0.91 |
| C42                   | <b>8.35</b> ±0.69 | 7.37±0.14   | 8.57±0.09   | <b>7.59</b> ±0.54  | <b>8.55</b> ±0.07 | 9.04±1.42   | <b>8.07</b> ±0.08  | <b>9.05</b> ±0.73 | <b>6.82</b> ±0.24 | <b>6.97</b> ±0.05  | <b>8.66</b> ±0.83 | <b>7.18</b> ±0.93 |
| C44                   | <b>6.38</b> ±0.58 | 5.71±0.13   | 6.67±0.01   | <b>5.93</b> ±0.54  | <b>6.64</b> ±0.19 | 7.05±1.15   | <b>6.23</b> ±0.03  | <b>7.03</b> ±0.51 | <b>5.23</b> ±0.30 | <b>5.42</b> ±0.07  | <b>6.75</b> ±0.61 | <b>5.62</b> ±0.69 |
| C46                   | <b>4.79</b> ±1.63 | 5.08±0.16   | 5.91±0.02   | <b>5.27</b> ±0.52  | <b>5.81</b> ±0.21 | 6.22±1.00   | <b>5.55</b> ±0.07  | <b>6.19</b> ±0.38 | <b>3.92</b> ±0.84 | <b>4.76</b> ±0.03  | <b>8.47</b> ±3.04 | <b>4.95</b> ±0.61 |
| C48                   | 4.55±0.31         | 4.07±0.22   | 4.74±0.08   | 4.37±0.22          | 4.81±0.13         | 5.15±0.88   | 4.47±0.08          | 5.05±0.45         | 3.83±0.18         | 3.79±0.13          | 5.07±0.1          | 4.08±0.56         |
| C50                   | 3.37±0.19         | 3.03±0.16   | 3.54±0.03   | 3.16±0.06          | 3.49±0.08         | 3.97±0.66   | 3.4±0.02           | 3.78±0.37         | 2.84±0.24         | 2.88±0.02          | 3.62±0.43         | 3.05±0.4          |
| C52                   | 2.94±0.17         | 2.44±0.46   | 3.09±0.09   | 2.73±0.04          | 3.03±0.11         | 3.28±0.40   | 2.91±0.10          | 3.24±0.30         | 2.52±0.23         | 2.53±0.09          | 3.20±0.56         | 2.69±0.53         |
| C54                   | 2.06±0.38         | 1.74±0.29   | 2.26±0.02   | 1.92±0.18          | 2.39±0.38         | 2.44±0.44   | 2.37±0.18          | 2.27±0.34         | 1.83±0.04         | 1.77±0.18          | 2.28±0.19         | 2.00±0.28         |
| Total                 | 66.8              | 57.4        | 67.5        | 60.0               | 69.2              | 72.3        | 65.1               | 72.0              | 53.7              | 57.8               | 72.5              | 57.7              |

Bold values represent the six most abundant TG in each cheese.

**Table S2.** Mean fatty acid (FA) composition (g FA/ 100 g fat) of EFAME fractions of control (Chc) and HPP treated (600 MPa/6 min - P1, 450 MPa/6 min – P2 and 450 MPa/9 min) *Serra da Estrela* cheeses.

| Storage time (months) | Chc         |             |             | P1 - 600 MPa/6 min |             |             | P2 - 450 MPa/6 min |             |             | P3 - 450 MPa/9 min |             |             |
|-----------------------|-------------|-------------|-------------|--------------------|-------------|-------------|--------------------|-------------|-------------|--------------------|-------------|-------------|
|                       | 0           | 6           | 15          | 0                  | 6           | 15          | 0                  | 6           | 15          | 0                  | 6           | 15          |
| SFA                   |             |             |             |                    |             |             |                    |             |             |                    |             |             |
| C4                    | 3.28±0.34   | 2.71±0.54   | 3.09±0.09   | 2.93±0.43          | 2.81±0.24   | 3.23±0.72   | 3.52±0.17          | 2.86±0.72   | 2.96±0.28   | 2.80±0.69          | 2.95±0.88   | 2.68±0.11   |
| C6                    | 2.16±0.02   | 2.02±0.44   | 2.27±0.01   | 2.19±0.38          | 2.11±0.19   | 2.34±0.57   | 2.55±0.02          | 2.15±0.61   | 2.14±0.25   | 2.04±0.48          | 2.18±0.59   | 1.95±0.01   |
| C8                    | 2.32±0.04   | 2.18±0.52   | 2.42±0.06   | 2.31±0.48          | 2.26±0.21   | 2.51±0.67   | 2.78±0.01          | 2.31±0.66   | 2.27±0.25   | 2.19±0.49          | 2.31±0.54   | 2.09±0.02   |
| C9                    | 0.061±0.004 | 0.057±0.015 | 0.065±0.000 | 0.062±0.012        | 0.061±0.003 | 0.067±0.019 | 0.073±0.001        | 0.062±0.018 | 0.061±0.012 | 0.056±0.013        | 0.062±0.013 | 0.056±0.002 |
| C10                   | 7.15±0.18   | 6.74±1.66   | 7.40±0.11   | 7.18±1.43          | 6.94±0.60   | 7.81±2.14   | 8.56±0.00          | 7.09±2.07   | 7.01±0.80   | 6.70±1.51          | 7.09±1.64   | 6.47±0.04   |
| C12                   | 4.02±0.02   | 3.79±0.85   | 4.18±0.13   | 3.97±0.78          | 3.92±0.40   | 4.41±1.13   | 4.8±0.08           | 3.98±1.09   | 3.95±0.39   | 3.77±0.94          | 4.01±0.99   | 3.66±0.07   |
| C13i                  | 0.078±0.003 | 0.061±0.012 | 0.064±0.005 | 0.079±0.012        | 0.069±0.016 | 0.062±0.016 | 0.069±0.004        | 0.059±0.009 | 0.057±0.002 | 0.055±0.017        | 0.056±0.016 | 0.054±0.004 |
| C13ai                 | 0.033±0.003 | 0.033±0.005 | 0.037±0.004 | 0.034±0.001        | 0.035±0.002 | 0.034±0.006 | 0.039±0.003        | 0.034±0.006 | 0.033±0.001 | 0.033±0.01         | 0.035±0.010 | 0.032±0.002 |
| C14                   | 9.65±0.03   | 9.08±2.00   | 10.1±0.24   | 9.53±1.85          | 9.43±0.95   | 10.68±2.7   | 11.51±0.26         | 9.58±2.64   | 9.57±0.98   | 9.03±2.27          | 9.65±2.41   | 8.84±0.11   |
| C14i                  | 0.25±0.01   | 0.24±0.04   | 0.26±0.02   | 0.25±0.03          | 0.25±0.04   | 0.27±0.05   | 0.30±0.02          | 0.25±0.06   | 0.25±0.02   | 0.24±0.07          | 0.25±0.08   | 0.23±0.01   |
| C14ai                 | 0.23±0.01   | 0.22±0.04   | 0.24±0.02   | 0.22±0.03          | 0.22±0.03   | 0.25±0.05   | 0.27±0.02          | 0.23±0.05   | 0.23±0.01   | 0.22±0.06          | 0.23±0.07   | 0.21±0.02   |
| C15                   | 0.86±0.02   | 0.81±0.16   | 0.9±0.05    | 0.85±0.14          | 0.84±0.10   | 0.94±0.21   | 1.02±0.05          | 0.86±0.21   | 0.85±0.07   | 0.81±0.22          | 0.86±0.24   | 0.79±0.03   |
| C16                   | 18.42±0.04  | 17.36±3.79  | 19.26±0.45  | 18.17±3.47         | 17.99±1.82  | 20.41±5.13  | 21.95±0.49         | 18.32±5.01  | 18.27±1.86  | 17.26±4.39         | 18.42±4.63  | 16.87±0.17  |
| C16i                  | 0.12±0.00   | 0.09±0.02   | 0.1±0.00    | 0.13±0.02          | 0.13±0.01   | 0.10±0.02   | 0.11±0.00          | 0.1±0.02    | 0.09±0.01   | 0.09±0.02          | 0.09±0.02   | 0.09±0.00   |
| C17                   | 0.47±0.02   | 0.45±0.08   | 0.5±0.03    | 0.47±0.07          | 0.47±0.07   | 0.52±0.11   | 0.56±0.02          | 0.47±0.11   | 0.47±0.03   | 0.45±0.12          | 0.47±0.13   | 0.43±0.02   |
| C17i                  | 0.33±0.02   | 0.32±0.05   | 0.36±0.02   | 0.33±0.05          | 0.33±0.05   | 0.38±0.08   | 0.40±0.02          | 0.34±0.07   | 0.33±0.01   | 0.32±0.09          | 0.34±0.10   | 0.31±0.02   |
| C17ai                 | 0.52±0.02   | 0.49±0.09   | 0.56±0.04   | 0.52±0.08          | 0.52±0.08   | 0.58±0.12   | 0.63±0.03          | 0.52±0.12   | 0.52±0.03   | 0.50±0.14          | 0.54±0.16   | 0.48±0.03   |
| C18                   | 8.40±0.46   | 7.87±1.23   | 8.79±0.71   | 8.23±1.09          | 8.26±1.29   | 9.25±1.76   | 10.01±0.80         | 8.3±1.79    | 8.32±0.37   | 7.93±2.47          | 8.47±2.63   | 7.7±0.51    |
| C18i                  | 0.054±0.006 | 0.051±0.002 | 0.063±0.007 | 0.053±0.01         | 0.055±0.009 | 0.065±0.014 | 0.06±0.008         | 0.055±0.008 | 0.063±0.005 | 0.053±0.019        | 0.056±0.013 | 0.057±0.00  |
| C20                   | 0.23±0.01   | 0.22±0.03   | 0.24±0.01   | 0.22±0.03          | 0.23±0.04   | 0.25±0.04   | 0.27±0.02          | 0.23±0.05   | 0.23±0.01   | 0.22±0.07          | 0.24±0.08   | 0.21±0.01   |
| C21                   | 0.074±0.004 | 0.075±0.003 | 0.079±0.01  | 0.073±0.008        | 0.076±0.012 | 0.081±0.011 | 0.081±0.005        | 0.082±0.018 | 0.077±0.00  | 0.07±0.018         | 0.071±0.021 | 0.07±0.004  |
| C22                   | 0.13±0.00   | 0.13±0.02   | 0.15±0.02   | 0.14±0.02          | 0.13±0.02   | 0.15±0.03   | 0.16±0.01          | 0.13±0.03   | 0.14±0.01   | 0.13±0.04          | 0.14±0.04   | 0.13±0.01   |
| C24                   | 0.075±0.005 | 0.079±0.017 | 0.077±0.008 | 0.07±0.009         | 0.078±0.014 | 0.087±0.008 | 0.072±0.004        | 0.075±0.013 | 0.072±0.011 | 0.071±0.021        | 0.084±0.026 | 0.068±0.012 |

| MUFA          |             |             |             |             |             |             |             |             |             |             |             |             |
|---------------|-------------|-------------|-------------|-------------|-------------|-------------|-------------|-------------|-------------|-------------|-------------|-------------|
| C10:1         | 0.26±0.01   | 0.25±0.04   | 0.27±0.02   | 0.26±0.04   | 0.26±0.03   | 0.28±0.06   | 0.31±0.01   | 0.26±0.06   | 0.25±0.01   | 0.25±0.07   | 0.26±0.07   | 0.24±0.01   |
| C12:1         | 0.10±0.01   | 0.09±0.01   | 0.09±0.01   | 0.09±0.01   | 0.10±0.02   | 0.10±0.02   | 0.11±0.01   | 0.09±0.02   | 0.09±0.00   | 0.08±0.03   | 0.09±0.03   | 0.08±0.01   |
| C14:1         | 0.55±0.03   | 0.52±0.07   | 0.59±0.05   | 0.54±0.07   | 0.55±0.08   | 0.61±0.12   | 0.65±0.05   | 0.55±0.12   | 0.56±0.03   | 0.52±0.16   | 0.56±0.16   | 0.51±0.03   |
| C15:1         | 0.25±0.01   | 0.24±0.04   | 0.27±0.01   | 0.25±0.04   | 0.25±0.04   | 0.27±0.06   | 0.30±0.02   | 0.25±0.06   | 0.25±0.01   | 0.24±0.07   | 0.25±0.07   | 0.23±0.01   |
| C16:1 9t      | 0.17±0.01   | 0.16±0.03   | 0.18±0.01   | 0.17±0.03   | 0.17±0.02   | 0.19±0.03   | 0.21±0.01   | 0.17±0.04   | 0.17±0.01   | 0.16±0.05   | 0.18±0.05   | 0.16±0.01   |
| C16:1 9t      | 0.36±0.01   | 0.35±0.08   | 0.39±0.02   | 0.36±0.07   | 0.37±0.05   | 0.41±0.09   | 0.44±0.02   | 0.37±0.09   | 0.36±0.03   | 0.35±0.09   | 0.38±0.11   | 0.34±0.01   |
| C16:1 7c      | 0.71±0.03   | 0.66±0.12   | 0.74±0.05   | 0.7±0.11    | 0.69±0.10   | 0.77±0.16   | 0.85±0.05   | 0.70±0.16   | 0.69±0.03   | 0.63±0.13   | 0.72±0.21   | 0.64±0.04   |
| C16:1 9c      | 0.08±0.006  | 0.076±0.008 | 0.094±0.008 | 0.079±0.009 | 0.085±0.017 | 0.092±0.015 | 0.095±0.006 | 0.081±0.016 | 0.079±0.001 | 0.076±0.024 | 0.088±0.028 | 0.076±0.005 |
| C17:1 9c      | 0.051±0.004 | 0.049±0.006 | 0.057±0.007 | 0.048±0.008 | 0.051±0.007 | 0.057±0.013 | 0.055±0.002 | 0.052±0.009 | 0.051±0.002 | 0.051±0.015 | 0.055±0.012 | 0.044±0.001 |
| C17:1 10c     | 0.17±0.01   | 0.16±0.02   | 0.18±0.02   | 0.17±0.02   | 0.17±0.03   | 0.19±0.04   | 0.21±0.01   | 0.17±0.03   | 0.17±0.01   | 0.16±0.05   | 0.18±0.05   | 0.16±0.01   |
| C18:1 4t+5t   | 0.026±0.003 | 0.025±0.004 | 0.03±0.004  | 0.027±0.002 | 0.032±0.004 | 0.033±0.005 | 0.03±0.001  | 0.03±0.008  | 0.032±0.000 | 0.027±0.006 | 0.03±0.007  | 0.027±0.002 |
| C18:1 6-9t    | 0.39±0.01   | 0.35±0.04   | 0.38±0.05   | 0.39±0.05   | 0.37±0.07   | 0.41±0.08   | 0.43±0.06   | 0.39±0.08   | 0.38±0.02   | 0.35±0.07   | 0.39±0.12   | 0.05±0.00   |
| C18:1 10t     | 0.23±0.02   | 0.22±0.03   | 0.22±0.01   | 0.19±0.04   | 0.23±0.03   | 0.25±0.08   | 0.26±0.02   | 0.24±0.07   | 0.19±0.01   | 0.23±0.07   | 0.22±0.05   | 0.31±0.00   |
| C18:1 11t     | 2.09±0.10   | 2.01±0.37   | 2.17±0.19   | 2.08±0.26   | 2.06±0.28   | 2.27±0.42   | 2.50±0.19   | 2.03±0.42   | 2.05±0.04   | 1.97±0.59   | 2.11±0.65   | 1.99±0.01   |
| C18:1 12t     | 0.32±0.02   | 0.31±0.05   | 0.34±0.03   | 0.33±0.05   | 0.33±0.05   | 0.36±0.07   | 0.38±0.03   | 0.33±0.07   | 0.33±0.02   | 0.31±0.10   | 0.33±0.10   | 0.29±0.01   |
| C18:1 9c      | 13.45±0.91  | 12.55±1.96  | 13.92±1.47  | 13.18±1.68  | 13.15±2.25  | 14.49±2.65  | 16.09±1.38  | 13.15±2.64  | 13.08±0.27  | 12.73±4.03  | 13.52±4.3   | 12.21±1.14  |
| C18:1 15t     | 0.21±0.01   | 0.2±0.01    | 0.25±0.04   | 0.21±0.01   | 0.23±0.03   | 0.27±0.04   | 0.27±0.01   | 0.24±0.04   | 0.24±0.01   | 0.22±0.06   | 0.24±0.05   | 0.20±0.00   |
| C18:1 11c     | 0.27±0.01   | 0.25±0.04   | 0.28±0.03   | 0.27±0.04   | 0.27±0.05   | 0.30±0.06   | 0.32±0.03   | 0.27±0.06   | 0.27±0.00   | 0.26±0.05   | 0.28±0.08   | 0.25±0.02   |
| C18:1 12c     | 0.13±0.00   | 0.12±0.02   | 0.14±0.02   | 0.13±0.02   | 0.13±0.02   | 0.15±0.04   | 0.15±0.01   | 0.13±0.04   | 0.13±0.00   | 0.13±0.03   | 0.14±0.03   | 0.12±0.00   |
| C18:1 13c     | 0.072±0.004 | 0.07±0.007  | 0.076±0.009 | 0.072±0.012 | 0.081±0.011 | 0.077±0.019 | 0.085±0.008 | 0.075±0.014 | 0.077±0.003 | 0.076±0.021 | 0.079±0.02  | 0.068±0.002 |
| C18:1 14c+16t | 0.59±0.04   | 0.56±0.08   | 0.61±0.08   | 0.59±0.09   | 0.59±0.10   | 0.64±0.12   | 0.68±0.06   | 0.58±0.14   | 0.59±0.02   | 0.57±0.16   | 0.60±0.19   | 0.54±0.04   |
| C20:1 c9      | 0.046±0.006 | 0.049±0.002 | 0.057±0.002 | 0.046±0.006 | 0.055±0.012 | 0.062±0.012 | 0.056±0.001 | 0.067±0.018 | 0.066±0.006 | 0.053±0.014 | 0.061±0.016 | 0.051±0.004 |
| PUFA          |             |             |             |             |             |             |             |             |             |             |             |             |
| C18:2 9t,12t  | 0.54±0.02   | 0.53±0.08   | 0.58±0.06   | 0.56±0.09   | 0.55±0.08   | 0.60±0.11   | 0.60±0.13   | 0.55±0.12   | 0.56±0.02   | 0.54±0.17   | 0.57±0.17   | 0.51±0.03   |
| C18:2 9c,12t  | 0.22±0.02   | 0.21±0.03   | 0.23±0.03   | 0.22±0.03   | 0.23±0.04   | 0.24±0.05   | 0.25±0.03   | 0.21±0.03   | 0.22±0.00   | 0.22±0.07   | 0.23±0.07   | 0.20±0.02   |
| C18:2 9t,12c  | 0.47±0.03   | 0.44±0.08   | 0.48±0.03   | 0.45±0.07   | 0.46±0.06   | 0.50±0.12   | 0.53±0.04   | 0.45±0.11   | 0.45±0.02   | 0.43±0.13   | 0.47±0.13   | 0.41±0.02   |
| C18:2 9c,15c  | 0.14±0.01   | 0.15±0.03   | 0.16±0.01   | 0.14±0.03   | 0.16±0.02   | 0.16±0.03   | 0.16±0.02   | 0.16±0.03   | 0.15±0.01   | 0.15±0.05   | 0.15±0.04   | 0.14±0.00   |

|                       |             |             |             |             |             |             |             |             |             |             |             |             |
|-----------------------|-------------|-------------|-------------|-------------|-------------|-------------|-------------|-------------|-------------|-------------|-------------|-------------|
| C18:2 9c,12c          | 1.30±0.03   | 1.23±0.25   | 1.35±0.09   | 1.29±0.22   | 1.29±0.17   | 1.40±0.31   | 1.55±0.07   | 1.29±0.31   | 1.27±0.07   | 1.24±0.34   | 1.31±0.35   | 1.18±0.05   |
| C18:2 9c,11t CLA      | 1.09±0.08   | 1.01±0.15   | 1.14±0.12   | 1.06±0.14   | 1.07±0.19   | 1.18±0.22   | 1.30±0.11   | 1.07±0.21   | 1.06±0.03   | 1.03±0.33   | 1.09±0.35   | 0.99±0.09   |
| CLA c,c               | 0.10±0.01   | 0.12±0.01   | 0.13±0.01   | 0.12±0.02   | 0.13±0.02   | 0.14±0.03   | 0.13±0.00   | 0.13±0.03   | 0.15±0.00   | 0.12±0.03   | 0.14±0.03   | 0.12±0.00   |
| CLA t,t               | 0.19±0.00   | 0.20±0.01   | 0.21±0.02   | 0.19±0.03   | 0.21±0.04   | 0.21±0.04   | 0.22±0.02   | 0.19±0.04   | 0.22±0.01   | 0.21±0.09   | 0.20±0.04   | 0.18±0.00   |
| ∂ C18:3 6c,9c,13c     | 0.028±0.001 | 0.069±0.01  | 0.039±0.002 | 0.039±0.00  | 0.035±0.003 | 0.036±0.006 | 0.033±0.003 | 0.034±0.011 | 0.037±0.001 | 0.028±0.007 | 0.036±0.007 | 0.03±0.00   |
| αC18:3 9c,12c,15c     | 0.92±0.01   | 0.87±0.18   | 0.94±0.06   | 0.91±0.17   | 0.91±0.11   | 0.98±0.22   | 1.11±0.03   | 0.91±0.22   | 0.90±0.05   | 0.88±0.24   | 0.92±0.23   | 0.83±0.05   |
| C18:4 n6              | 0.12±0.01   | 0.11±0.02   | 0.12±0.01   | 0.12±0.03   | 0.12±0.00   | 0.13±0.04   | 0.13±0.00   | 0.13±0.04   | 0.12±0.02   | 0.11±0.02   | 0.11±0.02   | 0.1±0.00    |
| C20:4 n6              | 0.088±0.003 | 0.089±0.014 | 0.099±0.003 | 0.089±0.019 | 0.092±0.012 | 0.103±0.029 | 0.101±0.002 | 0.098±0.028 | 0.094±0.009 | 0.098±0.033 | 0.091±0.02  | 0.085±0.008 |
| EPA 20:5 n3           | 0.064±0.004 | 0.065±0.014 | 0.072±0.002 | 0.073±0.005 | 0.071±0.003 | 0.069±0.016 | 0.071±0.003 | 0.069±0.021 | 0.068±0.000 | 0.066±0.025 | 0.07±0.015  | 0.064±0.003 |
| C22:5 n3 DPA          | 0.14±0.01   | 0.15±0.04   | 0.15±0.01   | 0.15±0.02   | 0.14±0.02   | 0.16±0.04   | 0.15±0.00   | 0.15±0.04   | 0.14±0.01   | 0.14±0.04   | 0.15±0.03   | 0.14±0.00   |
| C22:6 n3 DHA          | 0.078±0.003 | 0.074±0.006 | 0.087±0.007 | 0.093±0.006 | 0.077±0.003 | 0.09±0.016  | 0.093±0.003 | 0.086±0.02  | 0.083±0.01  | 0.084±0.03  | 0.074±0.015 | 0.073±0.005 |
| Total                 |             |             |             |             |             |             |             |             |             |             |             |             |
| SFA                   | 58.92±0.05  | 55.07±11.61 | 61.19±2.04  | 58.0±10.43  | 57.21±6.2   | 64.45±15.61 | 69.77±2.06  | 58.08±15.38 | 57.98±5.41  | 55.02±14.17 | 58.61±15.32 | 53.45±1.2   |
| MUFA                  | 20.51±1.25  | 19.28±3.04  | 21.33±2.14  | 20.17±2.67  | 20.21±3.3   | 22.26±4.21  | 24.47±1.98  | 20.23±4.21  | 20.1±0.54   | 19.45±5.91  | 20.76±6.39  | 18.57±1.35  |
| PUFA                  | 5.49±0.11   | 5.32±0.92   | 5.77±0.45   | 5.50±0.87   | 5.54±0.77   | 6.00±1.29   | 6.42±0.44   | 5.53±1.26   | 5.52±0.26   | 5.35±1.61   | 5.62±1.55   | 5.07±0.27   |
| CLA                   | 1.38±0.07   | 1.33±0.12   | 1.47±0.18   | 1.37±0.05   | 1.41±0.49   | 1.54±0.02   | 1.65±0.18   | 1.39±0.45   | 1.43±0.25   | 1.36±0.23   | 1.43±0.15   | 1.29±0.01   |
| Lipid quality indices |             |             |             |             |             |             |             |             |             |             |             |             |
| IA                    | 2.36        | 2.35        | 2.37        | 2.36        | 2.33        | 2.40        | 2.37        | 2.37        | 2.38        | 2.32        | 2.33        | 2.38        |
| IT                    | 2.60        | 2.55        | 2.60        | 2.58        | 2.56        | 2.64        | 2.62        | 2.59        | 2.61        | 2.55        | 2.56        | 2.61        |
| Omega 6/Omega 3       | 12.47       | 10.59       | 11.51       | 11.21       | 11.97       | 11.78       | 12.89       | 11.29       | 11.68       | 11.57       | 11.96       | 11.57       |

Data expressed as mean ( $n=2$ ). ai: anteiso; i: iso; c/t: cis/trans double bond; CLA: conjugated linoleic acid; DPA: docosapentaenoic acid; DHA: docosahexaenoic acid, SFA: total saturated fatty acids; MUFA: total monounsaturated fatty acids; PUFA: total polyunsaturated fatty acids; IA index of atherogenicity; IT index of thrombogenicity.

**Table S3.** Mean fatty acid (FA) composition (mg FA/ 100 g fat) of NEFAME fractions of non-processed (Chc) and HPP treated (600 MPa/6 min - P1, 450 MPa/6 min – P2 and 450 MPa/9 min) Serra da Estrela cheeses.

| Storage<br>time<br>(months) | Chc              |              |               | P1 - 600 MPa/6 min |              |              | P2 - 450 MPa/6 min |              |              | P3 - 450 MPa/9 min |              |              |
|-----------------------------|------------------|--------------|---------------|--------------------|--------------|--------------|--------------------|--------------|--------------|--------------------|--------------|--------------|
|                             | 0                | 6            | 15            | 0                  | 6            | 15           | 0                  | 6            | 15           | 0                  | 6            | 15           |
| <b>SFA</b>                  |                  |              |               |                    |              |              |                    |              |              |                    |              |              |
| C4                          | 153.9±13.74      | 148.34±16.75 | 148.12±2.26   | 136.76±11.87       | 137.97±1.22  | 117.45±14.84 | 136.02±9.52        | 145.51±7.37  | 116.34±9.37  | 132.3±3.94         | 166.96±3.62  | 112.61±5.5   |
| C6                          | 88.83±3.25       | 91.09±12.55  | 90.7±1.18     | 80.65±8.25         | 80.18±1.7    | 77.18±12.39  | 80.61±9.4          | 85.23±4.4    | 73.71±2.82   | 77.29±5.65         | 101.99±1.59  | 71.02±0.79   |
| C8                          | 67.7±3.04        | 76.87±13.31  | 80.97±4.46    | 64.07±8.7          | 69.21±2.74   | 72.97±14.04  | 65.78±8.91         | 70.21±3.32   | 65.15±0.78   | 63.11±5.67         | 88.82±3.08   | 61.82±3.33   |
| C9                          | 3007±1090        | 3724±489.6   | 4263±63.62    | 3077±386.2         | 3647±69.94   | 2659±385.7   | 3005±74.43         | 3861±861.2   | 3524±419.0   | 4075±500.8         | 4353±322.1   | 3476±570.2   |
| C10                         | 148.47±10.4<br>2 | 172.42±32.73 | 211.65±45.42  | 136.93±22.04       | 161.35±11.52 | 193.02±46.04 | 143.93±20.07       | 170.04±20.41 | 163.18±6.37  | 140.86±20.3        | 203±13.93    | 151.04±13.41 |
| C12                         | 53.8±3.53        | 77.72±1.06   | 84.57±21.4    | 51±7.2             | 61.26±7.07   | 82.7±20.35   | 52.97±7.34         | 67.84±12.01  | 75.84±9.22   | 48.71±3.93         | 73.42±6.01   | 64.66±9.57   |
| C13i                        | 1.15±0.06        | 1.33±0.17    | 1.88±0.08     | 0.93±0.16          | 1.63±0.09    | 2.1±0.16     | 1.19±0.02          | 1.19±0       | 2.17±0.24    | 1.18±0.21          | 1.69±0.19    | 1.4±0.2      |
| C14                         | 79.6±6.08        | 103.07±15.07 | 126.79±28.48  | 75.63±8.11         | 91.64±8.2    | 125.3±29.17  | 77.82±9.13         | 104.25±18.63 | 126.47±15.27 | 68.84±3.39         | 107.05±11.27 | 101.98±16.1  |
| C14i                        | 2.06±0.37        | 2.17±0.1     | 3.04±0.55     | 2.16±0.33          | 2.15±0.07    | 2.81±0.31    | 1.58±0.06          | 2.48±0.37    | 3.3±0.07     | 1.34±0.02          | 2.55±0.37    | 2.14±0.04    |
| C14ai                       | 3.16±0.11        | 3.94±0.58    | 6.03±0.84     | 2.97±0.04          | 3.62±0.36    | 5.82±0.68    | 2.75±0.28          | 4.45±0.95    | 5.09±0.32    | 2.7±0.25           | 4.51±0.66    | 4.18±0.52    |
| C15                         | 6.9±0.29         | 8.26±0.78    | 10.2±1.78     | 6.41±0.18          | 7.49±0.26    | 10.35±1.87   | 6.26±0.41          | 9.01±1.3     | 10.85±0.51   | 5.62±0.29          | 8.83±0.77    | 8.35±1.1     |
| C16                         | 118.62±6.8       | 145.94±20.35 | 192.88±26.82  | 113.73±8.52        | 133.55±9.24  | 179.23±44.02 | 114.26±11.66       | 154.14±31.91 | 192.57±20.35 | 98±7.55            | 151.39±16.66 | 148.07±20.63 |
| C16i                        | 2.11±0.09        | 2.3±0.34     | 2.97±0.44     | 2.22±0.04          | 2.24±0.04    | 2.84±0.59    | 1.91±0.14          | 2.31±0.14    | 2.8±0.46     | 1.66±0.13          | 2.55±0.38    | 2.21±0.22    |
| C17                         | 2.91±0.18        | 3.79±0.43    | 4.8±0.65      | 2.97±0.29          | 3.46±0.51    | 5.26±0.31    | 2.85±0.07          | 4±0.24       | 5.31±0.32    | 2.23±0.03          | 4.75±0.23    | 3.8±0.5      |
| C17i                        | 2.11±0.05        | 2.29±0.27    | 2.99±0.33     | 1.99±0.1           | 2.36±0.2     | 3.73±0.19    | 1.74±0.06          | 2.84±0.35    | 3.77±0.14    | 1.38±0.13          | 2.68±0.3     | 2.7±0.44     |
| C17ai                       | 3.72±0.14        | 4.44±0.47    | 5.85±0.86     | 3.58±0.18          | 4.45±0.18    | 6.58±0.97    | 3.19±0.16          | 5.14±0.66    | 6.94±0.14    | 2.98±0.05          | 5.27±0.83    | 4.9±0.46     |
| C18i                        | 41.03±0.07       | 49.23±5.78   | 63.7±12.62    | 39.47±0.32         | 46.9±1.54    | 63.07±13.4   | 38.68±1.96         | 53.86±9.51   | 68.22±5.4    | 33.15±2.38         | 51.86±4.35   | 51.88±5.23   |
| <b>MUFA</b>                 |                  |              |               |                    |              |              |                    |              |              |                    |              |              |
| C10:1                       | 7.25±0.09        | 8.33±0.5     | 9.46±1.08     | 6.63±0.5           | 7.65±0.03    | 8.7±1.49     | 6.78±0.48          | 7.98±0.4     | 8±0.91       | 6.8±0.87           | 9.79±0.11    | 7.27±0.25    |
| C12:1                       | 1.96±0.39        | 2.54±0.33    | 2.88±0.33     | 2.21±0.16          | 1.94±0.24    | 2.78±0.57    | 1.83±0             | 2.35±0.16    | 2.38±0.35    | 1.7±0.02           | 2.79±0.18    | 2.11±0.17    |
| C14:1                       | 4.45±0.53        | 5.29±0.46    | 6.94±1.08     | 4.15±0.26          | 5±0.02       | 7.25±0.95    | 3.84±0.01          | 5.7±0.68     | 6.78±0.48    | 3.23±0.05          | 9.59±0.37    | 8.66±0.64    |
| C15:1                       | 1.75±0.08        | 1.98±0.03    | 2.87±0.59     | 1.61±0.19          | 1.69±0.07    | 2.77±0.45    | 1.63±0.07          | 2±0.22       | 3.29±0.02    | 1.38±0.01          | 2±0.17       | 2.37±0.38    |
| C16:1 7c                    | 3.84±0.08        | 5.54±0.05    | 7.52±0.06     | 3.09±0.06          | 4.41±0.64    | 7.39±1.48    | 2.69±0.39          | 5.87±0.55    | 6.93±0.27    | 1.96±0.15          | 5.02±0.33    | 5.15±0.8     |
| C16:1 9c                    | 2.91±0.18        | 3.79±0.43    | 4.8±0.65      | 2.97±0.29          | 3.46±0.51    | 5.26±0.31    | 2.85±0.07          | 4±0.24       | 5.31±0.32    | 2.23±0.03          | 4.75±0.23    | 3.8±0.5      |
| C16:1 9t                    | 2.04±0.1         | 2.82±0.24    | 3.73±0.43     | 1.59±0.11          | 2.25±0.19    | 4.17±0.69    | 1.58±0.13          | 3.13±0.59    | 3.97±0.77    | 1.31±0.03          | 3.13±0.57    | 2.97±0.79    |
| C17:1 10c                   | 2.13±0.22        | 2.9±0.16     | 4.62±1.31     | 2.24±0.19          | 3.08±0.11    | 5.52±0.75    | 1.96±0             | 4.39±0.14    | 5.56±0.43    | 1.69±0.16          | 2.81±0.38    | 3.53±1.04    |
| C18:1 6-9t                  | 3.15±0.81        | 3.24±0.39    | 5.39±1.01     | 2.65±0.1           | 3.99±0.06    | 5.86±0.56    | 2.32±0.05          | 4.17±0.26    | 5.57±0.66    | 2.74±0.35          | 4±0.2        | 4.83±1.1     |
| C18:1 10t                   | 1.77±0.37        | 1.22±0.09    | 3.26±0.97     | 1.2±0.26           | 1.73±0.02    | 2.37±0.2     | 0.67±0.05          | 1.4±0.2      | 3.4±0.09     | 1.13±0.27          | 1.59±0.24    | 2.05±0.49    |
| C18:1 11t                   | 14.72±0.06       | 20.67±2.38   | 30.15±10.12   | 13.88±1.96         | 19.03±1.46   | 32.12±8.45   | 14.21±1.62         | 24.56±8.27   | 32.18±5.38   | 11.97±2.51         | 22.51±4.4    | 25.96±6.39   |
| C18:1 12t                   | 2.39±0.02        | 3.05±0.14    | 4.82±1.51     | 2.33±0.23          | 3.19±0.12    | 4.3±1.14     | 2.32±0.18          | 3.12±0.34    | 4.43±0.32    | 2.03±0.38          | 3.34±0.57    | 3.92±1.15    |
| C18:1 15t                   | 1.93±0.12        | 2.23±0.06    | 3.47±1.30     | 1.52±0.23          | 1.93±0.11    | 3.1±0.42     | 1.68±0.18          | 2.46±0.19    | 2.64±0.14    | 1.36±0.05          | 1.9±0.04     | 2.25±0.09    |
| C18:1 9c                    | 108.7±2.93       | 152.24±26.73 | 261.11±103.16 | 100.54±12.43       | 153.28±34.25 | 278.02±75.48 | 94.35±17.2         | 190.46±80.23 | 256.64±61.84 | 84.69±19.2         | 183.08±28.68 | 217.35±73.59 |
| C18:1 11c                   | 2.94±0.23        | 3.31±0.47    | 6.18±1.58     | 2.85±0.23          | 3.8±0.6      | 6.28±1.85    | 2.82±0.2           | 4.39±1.51    | 6.22±0.59    | 2.06±0.15          | 3.63±0.59    | 5.07±1.62    |
| C18:1 12c                   | 3.58±0.23        | 4.7±0.46     | 8.33±2.46     | 3.67±0.44          | 4.67±0.61    | 8.77±1.33    | 3.62±0.33          | 6.04±1.3     | 8.58±0.73    | 3.2±0.16           | 5.83±1.18    | 6.44±2.17    |

|                      |                    |                |             |                    |              |                    |                |                |                |                |                |                |
|----------------------|--------------------|----------------|-------------|--------------------|--------------|--------------------|----------------|----------------|----------------|----------------|----------------|----------------|
| C18:1<br>14c+16t     | 5.15±0.48          | 7.94±0.65      | 11.66±3.35  | 5.51±0.01          | 7.7±1.81     | 12.77±2.51         | 4.77±0.63      | 8.75±1.7       | 12.44±0.94     | 4.37±0.43      | 8.76±1.06      | 9.22±2.6       |
| PUFA                 |                    |                |             |                    |              |                    |                |                |                |                |                |                |
| C18:2 9t,12t         | 2.37±0.22          | 4.28±0.42      | 6.10±0.78   | 2.38±0.54          | 4.61±0.05    | 5.75±1.28          | 2.77±0.39      | 4.42±0.86      | 6.14±0.69      | 2.03±0.16      | 4.09±0.22      | 3.89±0.12      |
| C18:2 9c,12t         | 16.25±0.06         | 23.74±5.43     | 39.19±17.69 | 14.82±1.86         | 22.67±6.55   | 40.58±14.03        | 13.18±2.66     | 28.87±13.67    | 37.55±11.08    | 12.8±3.73      | 25.93±9.41     | 34.72±16.47    |
| C18:2 9c,11t<br>CLA  | 8.58±0.31          | 13.06±1.51     | 19.77±5.77  | 8.65±0.63          | 12.15±1.1    | 21.08±4.71         | 8.2±0.89       | 14.26±5.27     | 19.08±3.27     | 7.45±1.16      | 13.31±2.9      | 16.2±4.05      |
| αC18:3<br>9c,12c,15c | 14.45±2.22         | 24.14±6.33     | 38.85±18.14 | 14.37±2.15         | 22.04±7.27   | 38.79±14.06        | 13.74±2.3      | 28.47±14.66    | 34.57±11.72    | 14.35±1.88     | 25.62±8.03     | 32.26±12.99    |
| Total                |                    |                |             |                    |              |                    |                |                |                |                |                |                |
| SFA                  | 3783.45±108<br>5.5 | 4617.74±371.95 | 5301±83.52  | 3798.89±692.5<br>6 | 4457.02±28.6 | 3609.95±186.4<br>4 | 3736.68±153.51 | 4743.97±749.97 | 4445.76±374.73 | 4757.19±554.45 | 5330.89±377.53 | 4268.92±636.89 |
| MUFA                 | 175.95±0.56        | 238.82±34.05   | 388.8±2.38  | 163.02±22.46       | 235.94±41.61 | 410.16±103.08      | 154.49±21.85   | 289.69±101.09  | 385.2±73.32    | 137.87±24.86   | 282.29±40.85   | 323.01±97.1    |
| PUFA                 | 41.65±2.38         | 65.22±13.69    | 103.9±42.39 | 40.22±7.45         | 61.47±14.96  | 106.2±34.08        | 37.88±6.24     | 76.02±34.46    | 97.35±26.77    | 36.64±6.61     | 68.96±20.56    | 87.06±33.4     |

Data expressed as mean ( $n=2$ ); CLA: conjugated linoleic acid; SFA: total saturated fatty acids; MUFA: total monounsaturated fatty acids; PUFA: total polyunsaturated fatty acids.
